# Supplementary material for: Multi-tracer study of gas trapping in an East Antarctic ice core
Source: Copernicus journal article supplement (doi:10.5194/tc-13-3383-2019), 2019-12-17
Supplement: Supplementary file 2 [file tc-13-3383-2019-supplement.zip]

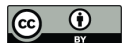

## *Supplement of*

# **Multi-tracer study of gas trapping in an East Antarctic ice core**

**Kévin Fourteau et al.**

*Correspondence to:* Kévin Fourteau ([kevin.fourteau@univ-grenoble-alpes.fr](mailto:kevin.fourteau@univ-grenoble-alpes.fr)) and Patricia Martinerie ([patricia.martinerie@univ-grenoble-alpes.fr](mailto:patricia.martinerie@univ-grenoble-alpes.fr))

- [tc-13-3383-2019-supplement-title-page.pdf](#)
- [Density\\_CR\\_profile.txt](#)
- [Supp.pdf](#)

The copyright of individual parts of the supplement might differ from the CC BY 4.0 License.
